# Supplementary material for: Charge-separation in panchromatic, vertically positioned bis(donor styryl)BODIPY–aluminum(iii) porphyrin–fullerene supramolecular triads
Source: Royal Society of Chemistry journal article supplement (doi:10.1039/c8nr06649c), 2018-01-01
Supplement: c8nr06649c1.pdf [file c8nr06649c1.pdf]

Supplementary Information

Charge-Separation in Panchromatic, Vertically Positioned  
Bis(donorstyryl)BODIPY – Aluminum(III) Porphyrin – Fullerene  
Supramolecular Triads

Niloofer Zarrabi,<sup>a</sup> Christopher O. Obondi,<sup>b</sup> Gary N. Lim,<sup>b</sup> Sairaman Seetharaman,<sup>b</sup> Benjamin G. Boe,<sup>a</sup> Francis D'Souza,<sup>\*,b</sup> Prashanth K. Poddutoori<sup>\*, a</sup>

<sup>a</sup>Department of Chemistry & Biochemistry, University of Minnesota Duluth, 1039 University Drive, Duluth, Minnesota 55812, United States. <sup>b</sup>Department of Chemistry, University of North Texas, 1155 Union Circle, # 305070, Denton, Texas 76203-5017, United States

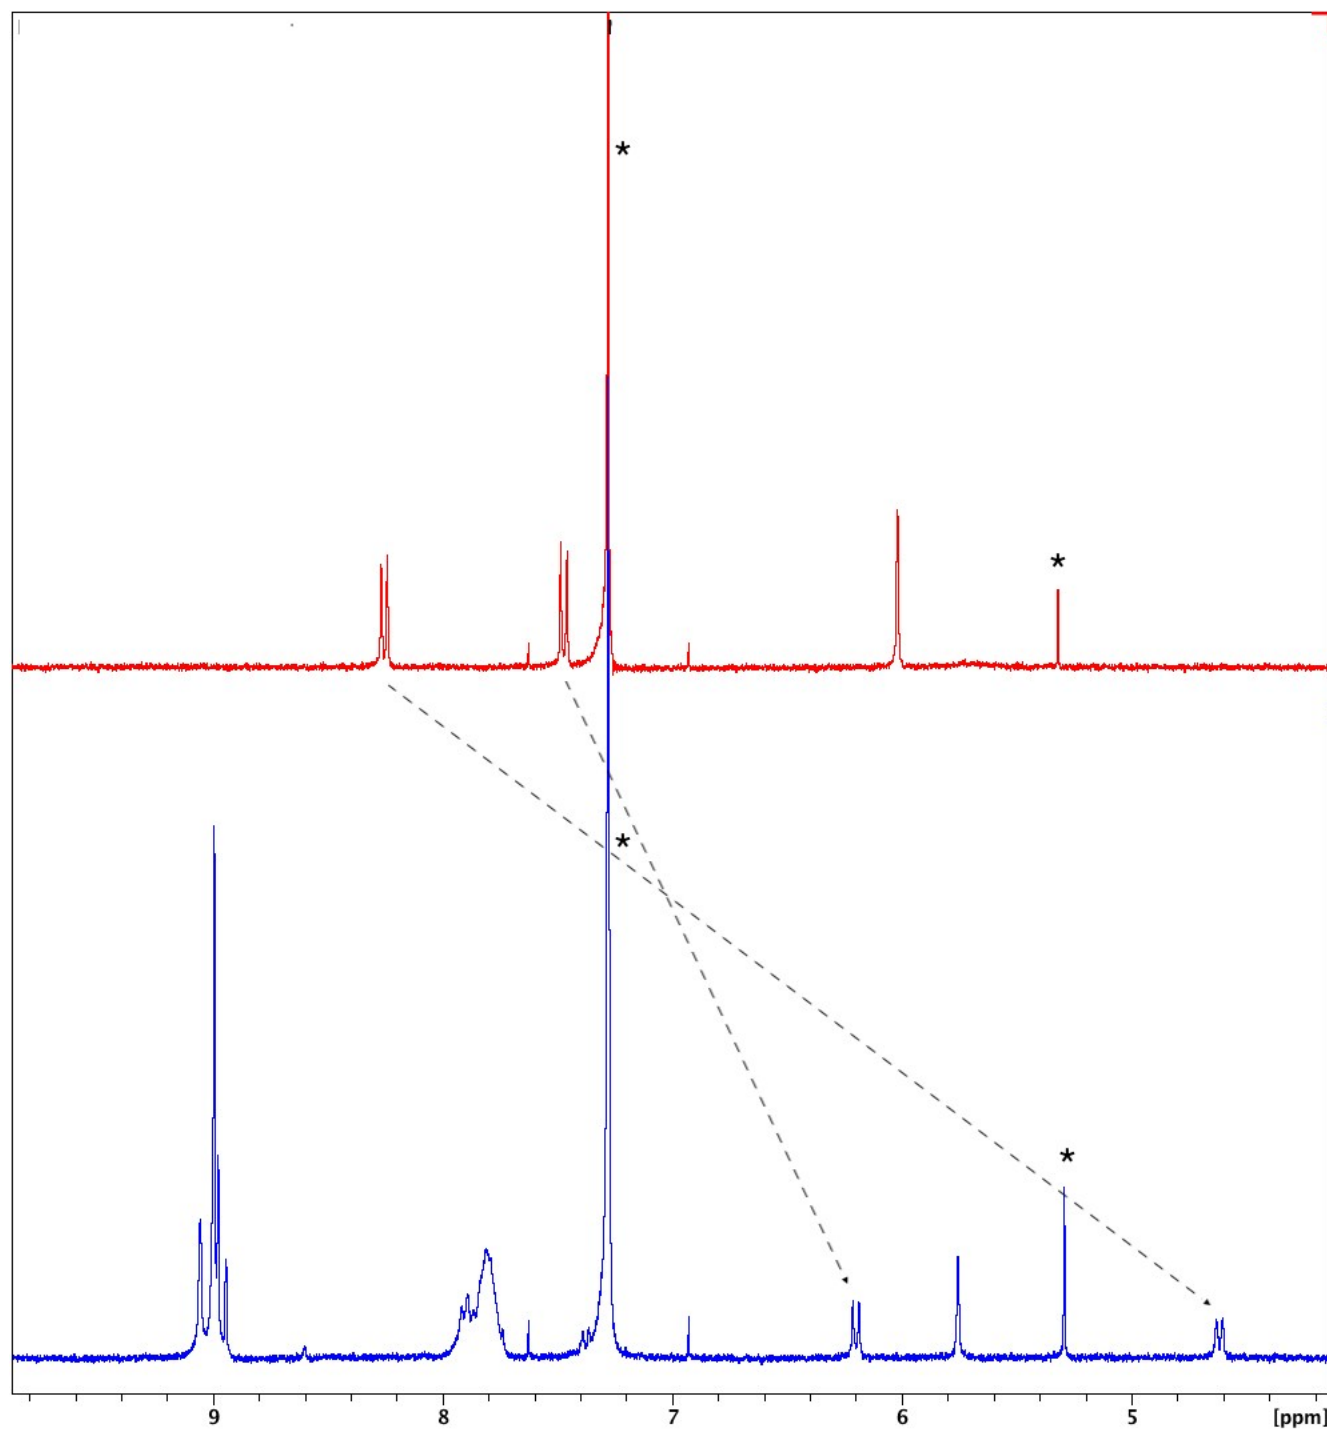

**Figure S1.**  $^1\text{H}$  NMR spectra of (a) BDP-COOH and (b) BDP-AlPorF<sub>3</sub> in CDCl<sub>3</sub>. Note: \*Peaks represent solvent peaks or solvent impurities.

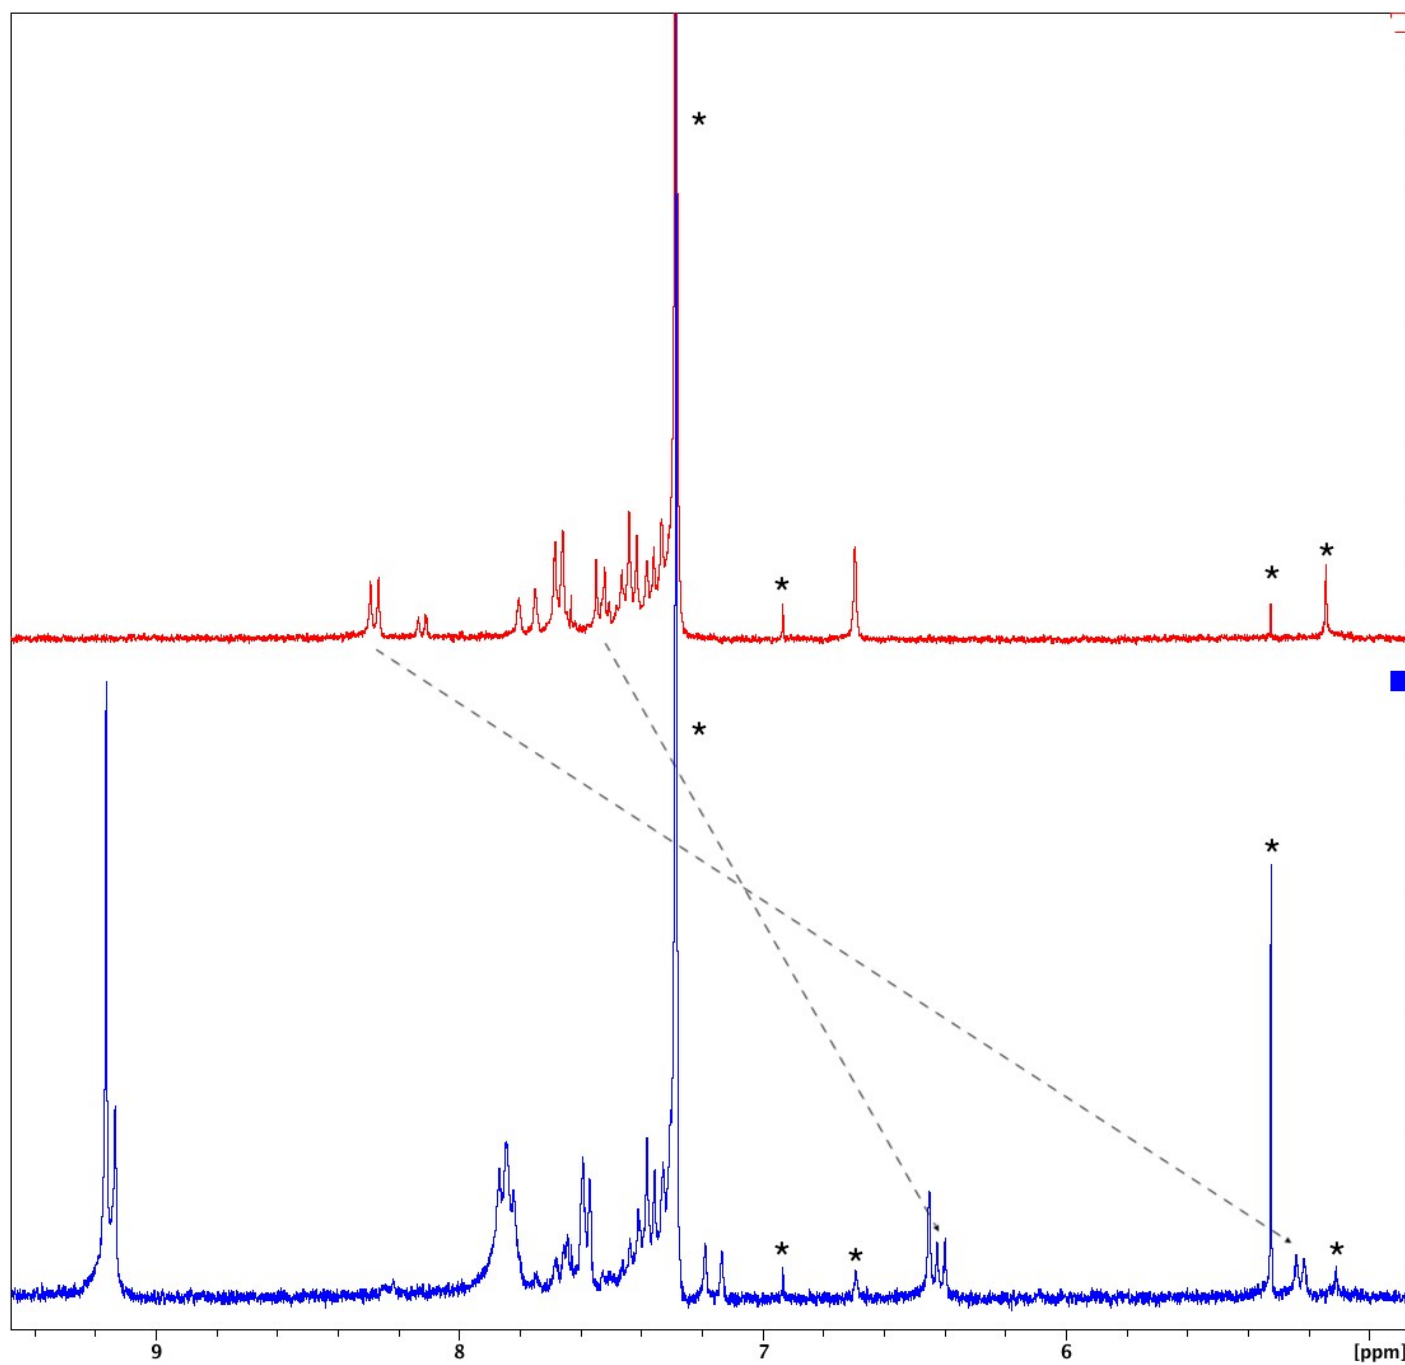

**Figure S2.** <sup>1</sup>H NMR spectra of (a) Ph<sub>2</sub>-BDP-COOH and (b) Ph<sub>2</sub>-BDP-AlPorF<sub>3</sub> in CDCl<sub>3</sub>. Note: \*Peaks represent solvent peaks or solvent impurities.

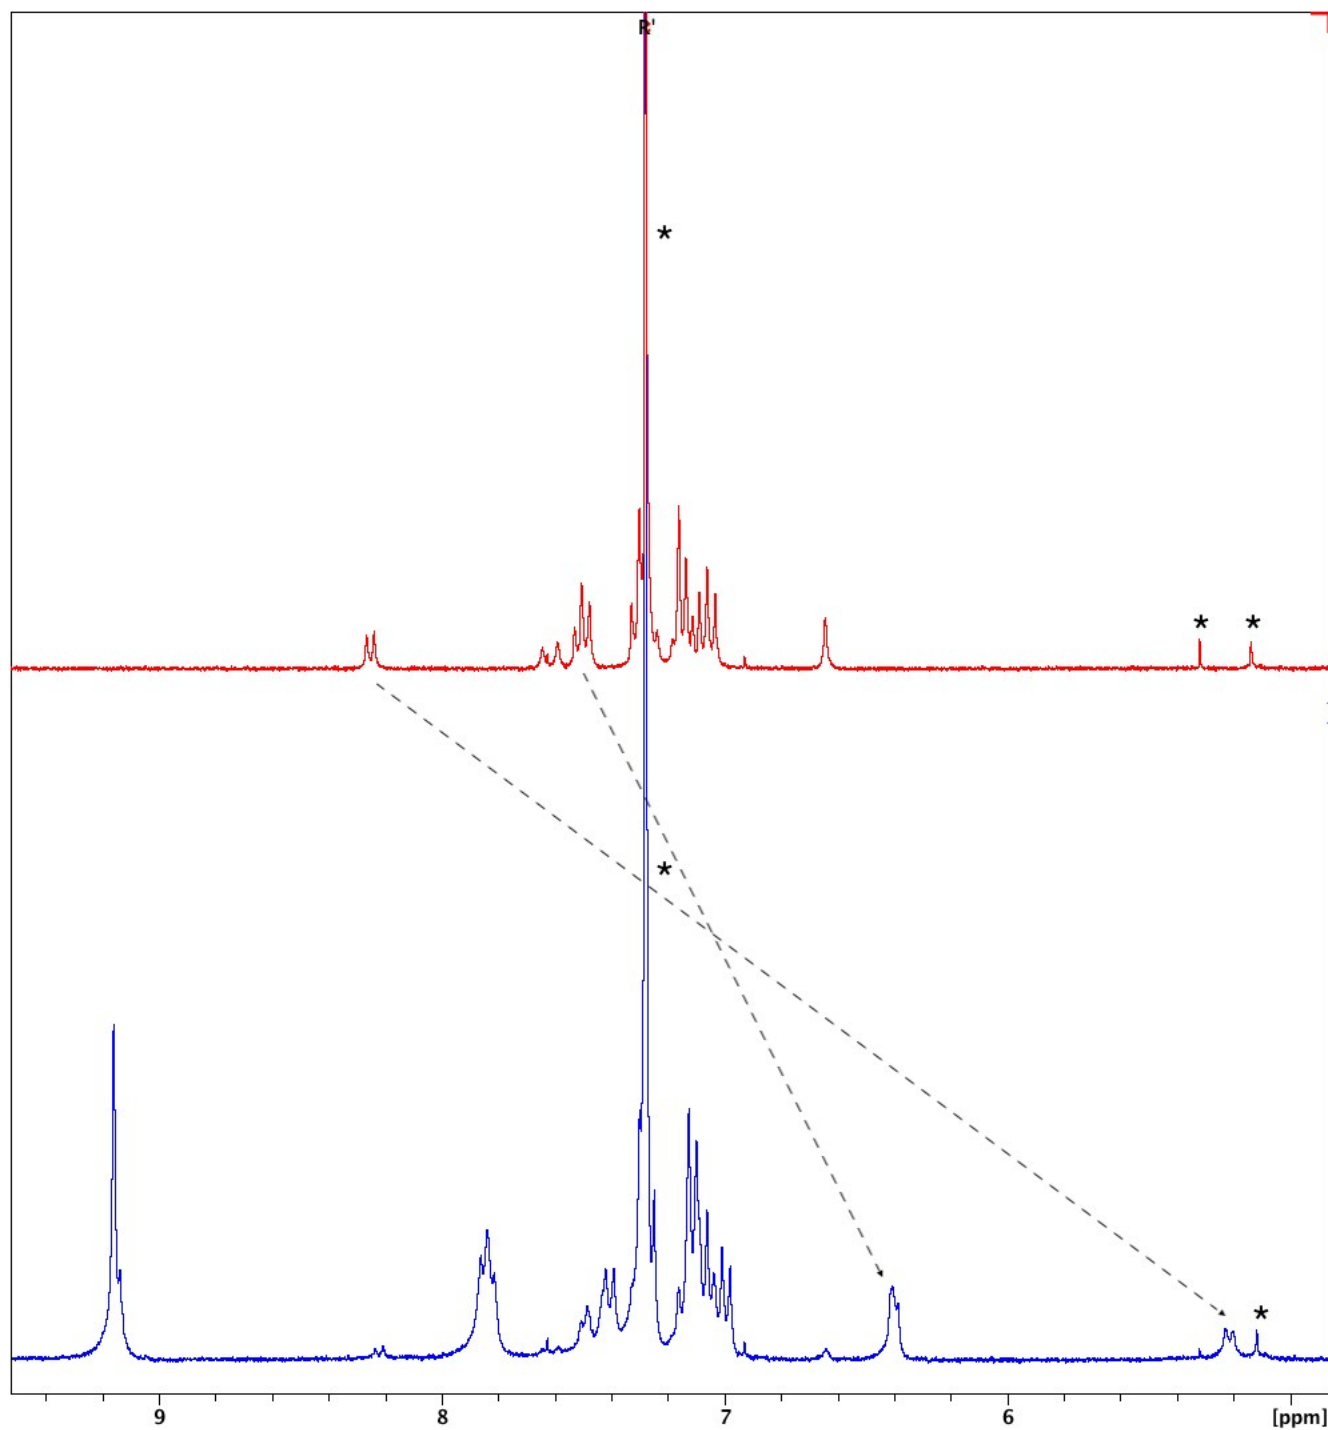

**Figure S3.**  $^1\text{H}$  NMR spectra of (a) TPA<sub>2</sub>-BDP-COOH and (b) TPA<sub>2</sub>-BDP-AlPorF<sub>3</sub> in CDCl<sub>3</sub>. Note: \*Peaks represent solvent peaks or solvent impurities.

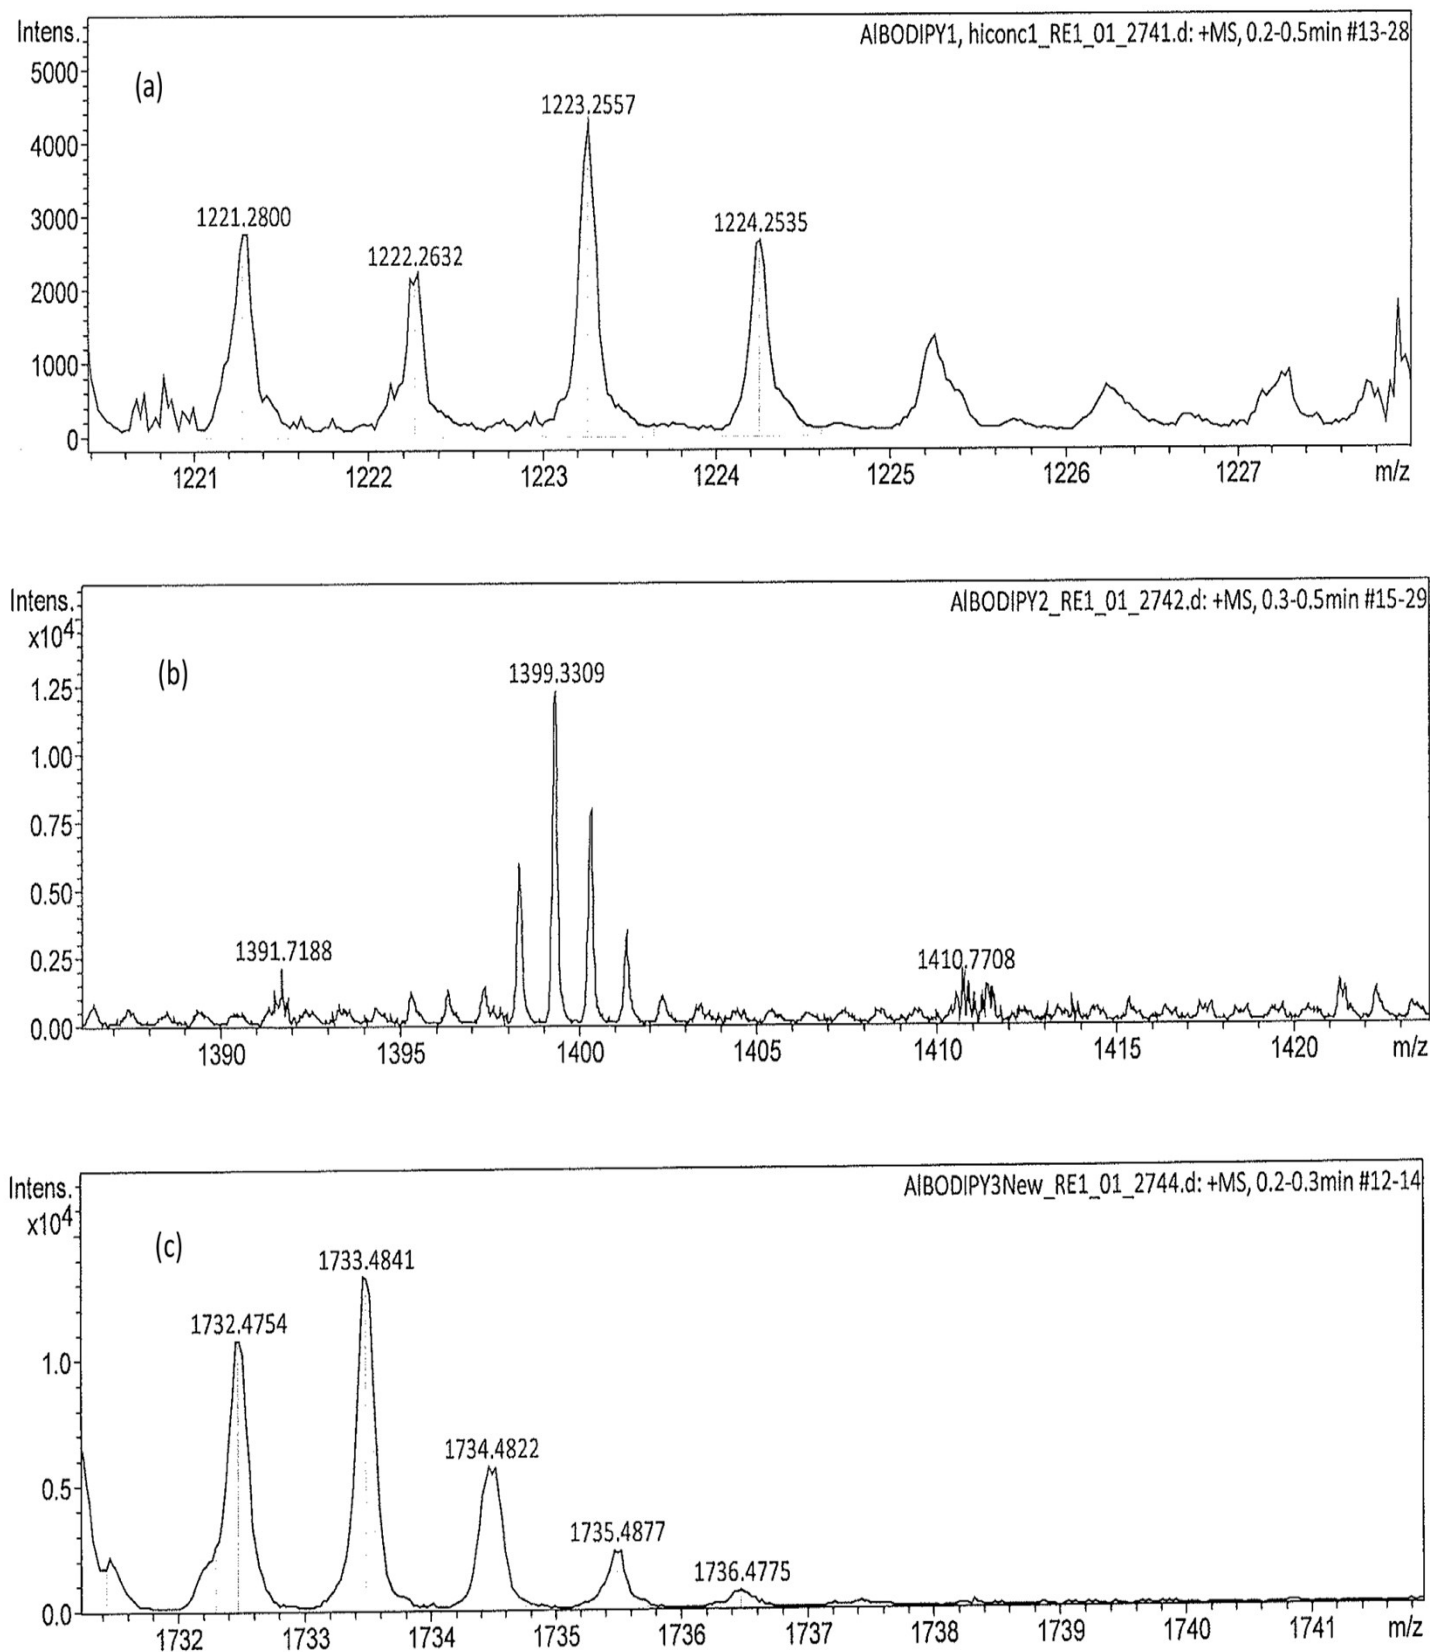

**Figure S4.** ESI high resolution mass spectra of (a) BDP-AlPorF<sub>3</sub> and (b) Ph<sub>2</sub>-BDP-AlPorF<sub>3</sub> and (c) TPA<sub>2</sub>-BDP-AlPorF<sub>3</sub>.

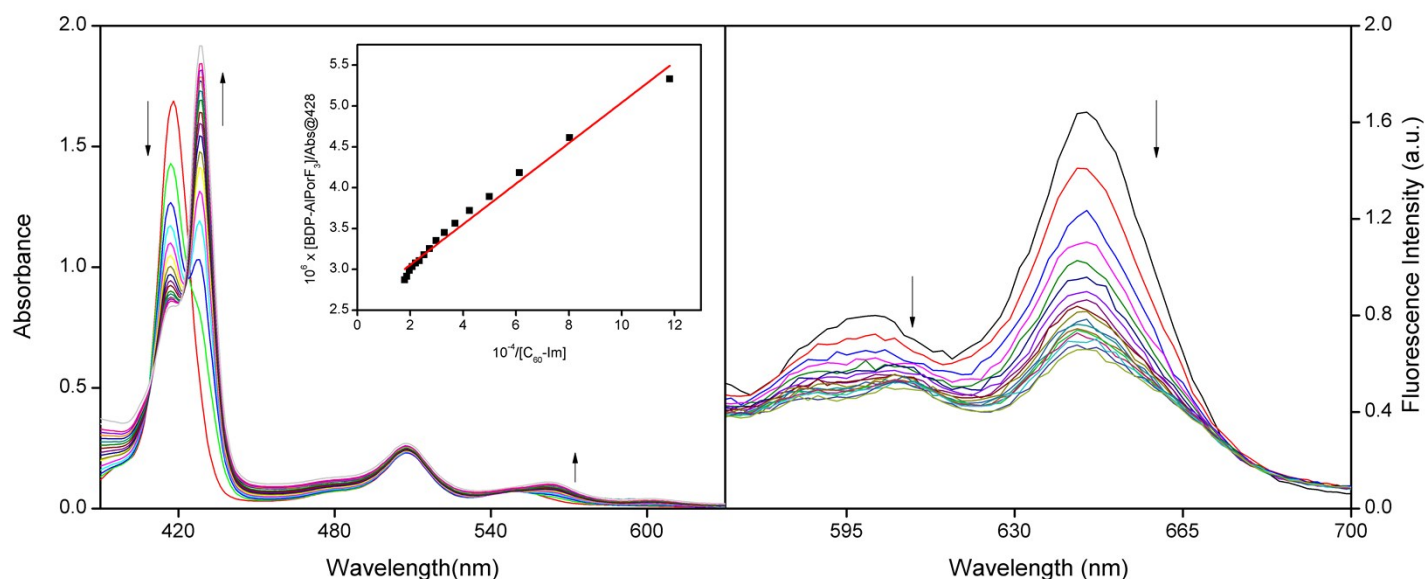

**Figure S5.** (a) Absorption and (b) fluorescence titrations of BDP-AlPorF<sub>3</sub> vs C<sub>60</sub>-Im in *o*-DCB. The inset shows the Benesi-Hildebrand plot of the absorbance change at 429 nm. The excitation wavelength was chosen at the isosbestic point, 555 nm, obtained from UV-visible titrations. In titrations C<sub>60</sub>-Im was added up to  $4.31 \times 10^{-6}$  M in 20  $\mu\text{l}$  ( $2.20 \times 10^{-4}$  M) increments to a 1 ml ( $5.5 \times 10^{-6}$  M) solution of BDP-AlPorF<sub>3</sub>.

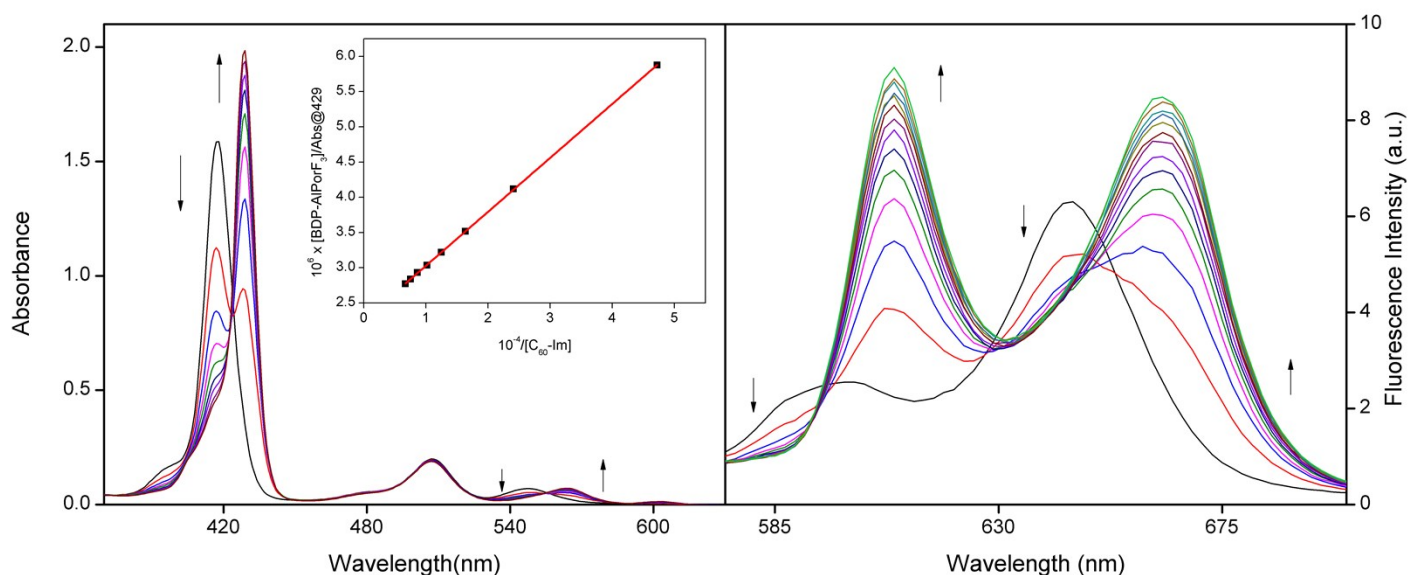

**Figure S6.** (a) Absorption and (b) fluorescence titrations of (BDP)-AlPorF<sub>3</sub> vs Me-Im in *o*-DCB. The inset shows the Benesi-Hildebrand plot of the absorbance change at 429 nm. The excitation wavelength was chosen at the isosbestic point, 555 nm, obtained from UV-visible titrations. In titrations Me-Im was added up to  $2.12 \times 10^{-6}$  M in 20  $\mu\text{l}$  ( $1.08 \times 10^{-4}$  M) increments to a 1 ml ( $5.5 \times 10^{-6}$  M) solution of (BDP)-AlPorF<sub>3</sub>.

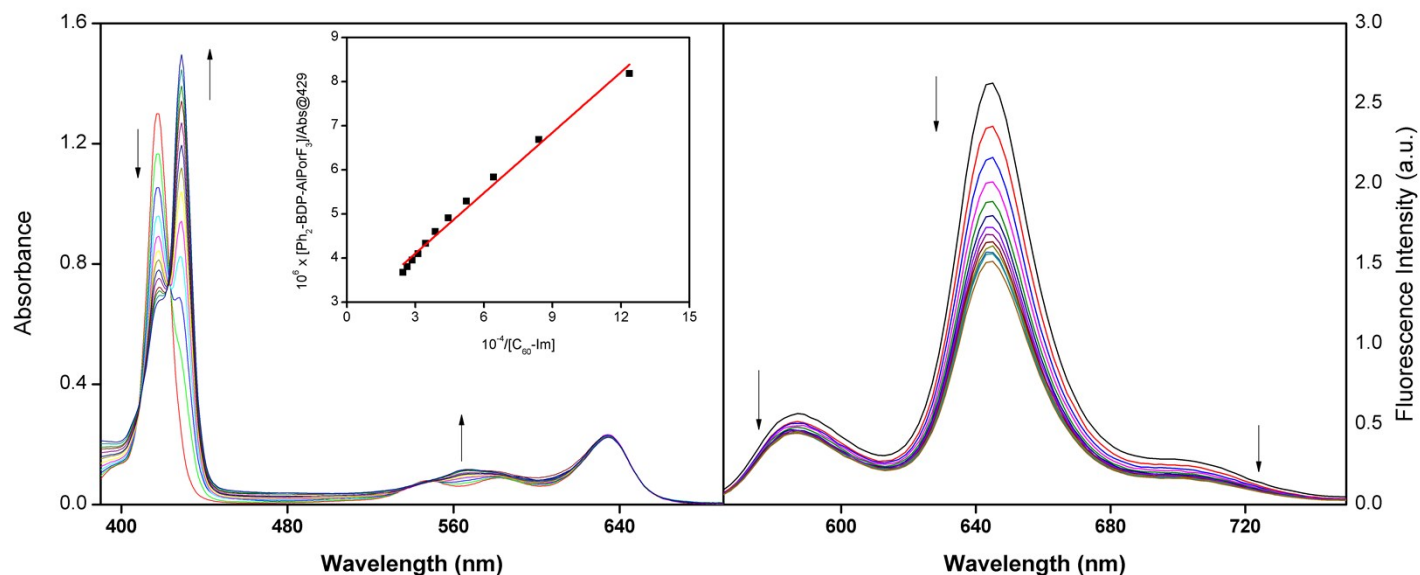

**Figure S7.** (a) Absorption and (b) fluorescence titrations of Ph<sub>2</sub>-BDP-AlPorF<sub>3</sub> vs C<sub>60</sub>-Im in *o*-DCB. The inset shows the Benesi–Hildebrand plot of the absorbance change at 429 nm. The excitation wavelength was chosen at the isosbestic point, 555 nm, obtained from UV-visible titrations. In titrations C<sub>60</sub>-Im was added up to  $4.12 \times 10^{-6}$  M in 20  $\mu\text{l}$  ( $2.1 \times 10^{-4}$  M) increments to a 1 ml ( $5.5 \times 10^{-6}$  M) solution of Ph<sub>2</sub>-BDP-AlPorF<sub>3</sub>.

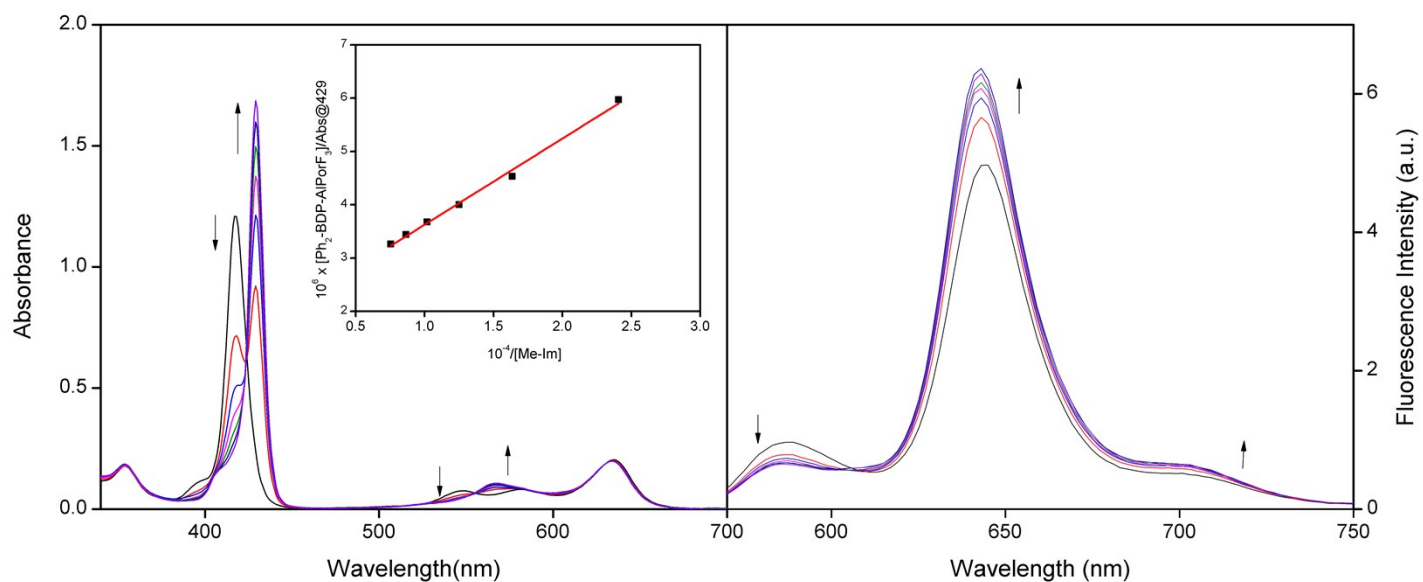

**Figure S8.** (a) Absorption and (b) fluorescence titrations of Ph<sub>2</sub>-BDP-AlPorF<sub>3</sub> vs Me-Im in *o*-DCB. The inset shows the Benesi–Hildebrand plot of the absorbance change at 429 nm. The excitation wavelength was chosen at the isosbestic point, 555 nm, obtained from UV-visible titrations. In titrations Me-Im was added up to  $2.12 \times 10^{-6}$  M in 20  $\mu\text{l}$  ( $1.08 \times 10^{-4}$  M) increments to a 1 ml ( $5.5 \times 10^{-6}$  M) solution of Ph<sub>2</sub>-BDP-AlPorF<sub>3</sub>.

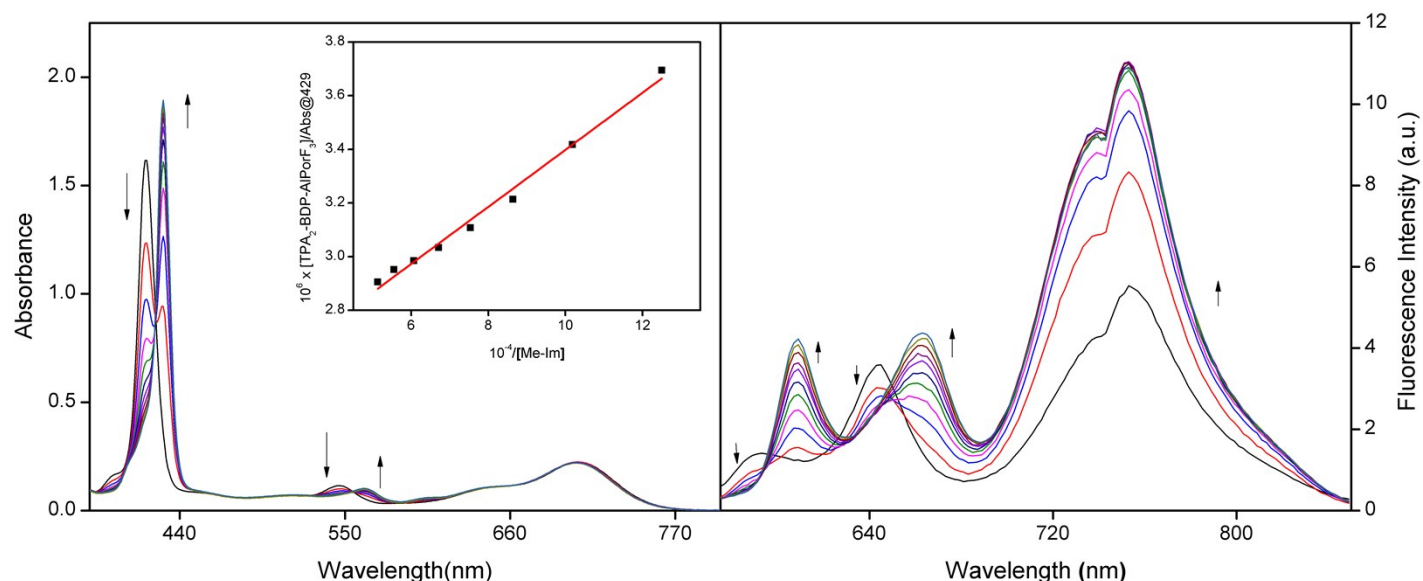

**Figure S9.** (a) Absorption and (b) fluorescence titrations of TPA<sub>2</sub>-BDP-AlPorF<sub>3</sub> vs Me-Im in *o*-DCB. The inset shows the Benesi-Hildebrand plot of the absorbance change at 429 nm. The excitation wavelength was chosen at the isosbestic point, 555 nm, obtained from UV-visible titrations. In titrations Me-Im was added up to  $5.5 \times 10^{-6}$  M in 20  $\mu\text{l}$  ( $1.08 \times 10^{-4}$  M) increments to a 1 ml ( $5.5 \times 10^{-6}$  M) solution of TPA<sub>2</sub>-BDP-AlPorF<sub>3</sub>.

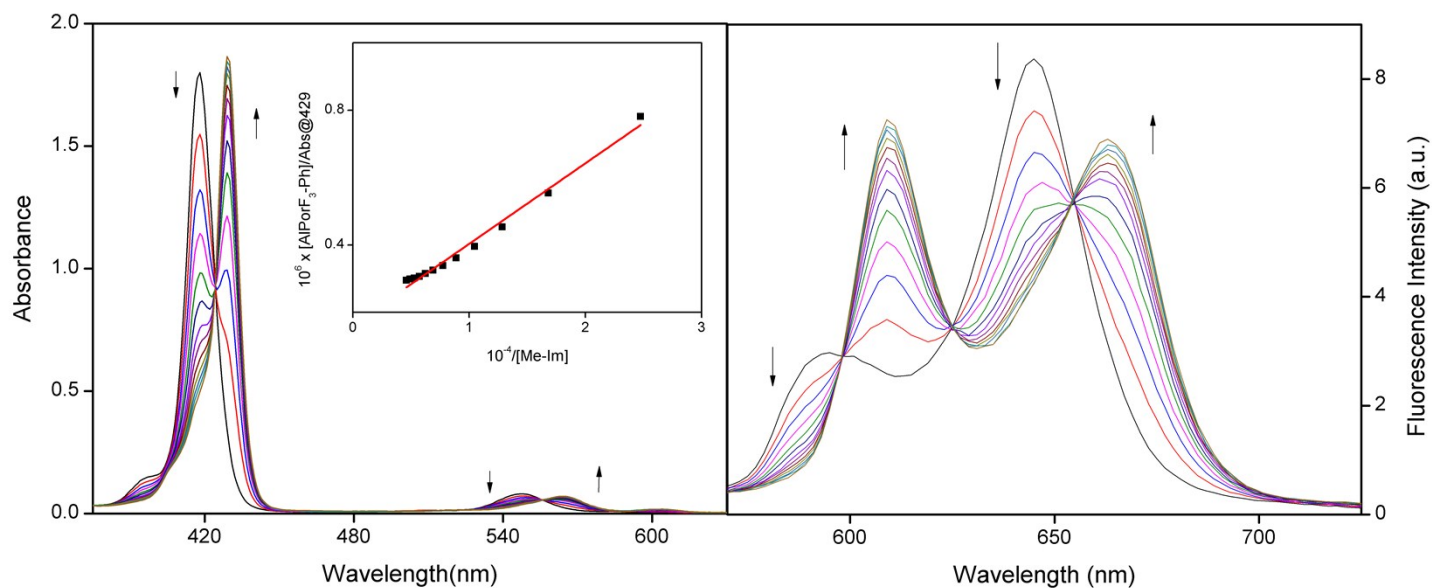

**Figure S10.** (a) Absorption and (b) fluorescence titrations of AlPorF<sub>3</sub>-Ph vs Me-Im in *o*-DCB. The inset shows the Benesi-Hildebrand plot of the absorbance change at 429 nm. The excitation wavelength was chosen at the isosbestic point, 555 nm, obtained from UV-visible titrations. In titrations Me-Im was added up to  $2.05 \times 10^{-6}$  M in 20  $\mu\text{l}$  ( $1.05 \times 10^{-4}$  M) increments to a 1 ml ( $5.5 \times 10^{-6}$  M) solution of AlPorF<sub>3</sub>-Ph.



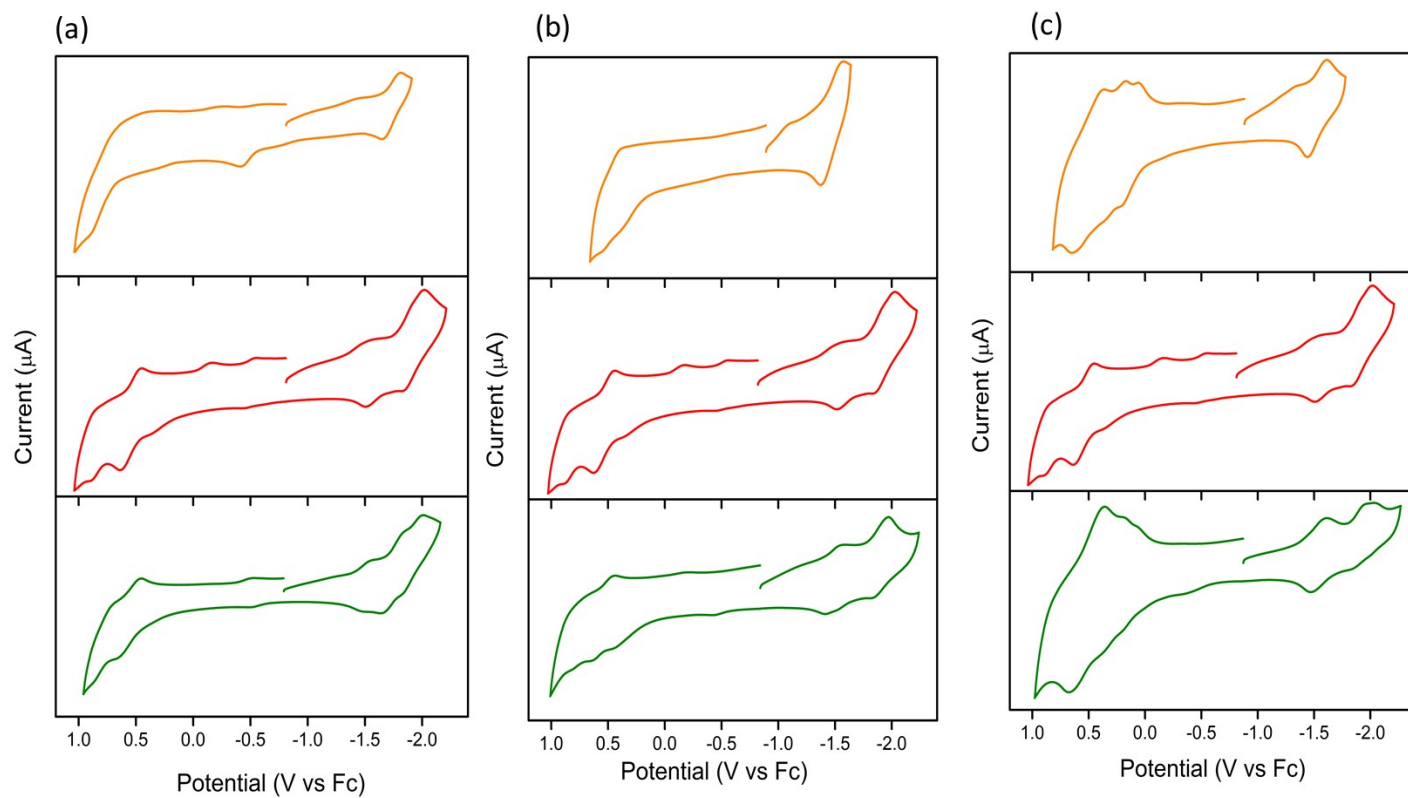

**Figure S11.** Cyclic voltammograms of (a) BDP-COOH (orange), AlPorF<sub>3</sub>-Ph (red) and BDP-AlPorF<sub>3</sub> (green), (b) Ph<sub>2</sub>-BDP-COOH (orange), AlPorF<sub>3</sub>-Ph (red) and Ph<sub>2</sub>-BDP-AlPorF<sub>3</sub> (green) and (c) TPA<sub>2</sub>-BDP-COOH (orange), AlPorF<sub>3</sub>-Ph (red) and TPA<sub>2</sub>-BDP-AlPorF<sub>3</sub> (green) in *o*-DCB containing 0.1 M TBA.ClO<sub>4</sub>. Scan rate = 100 mV/s.

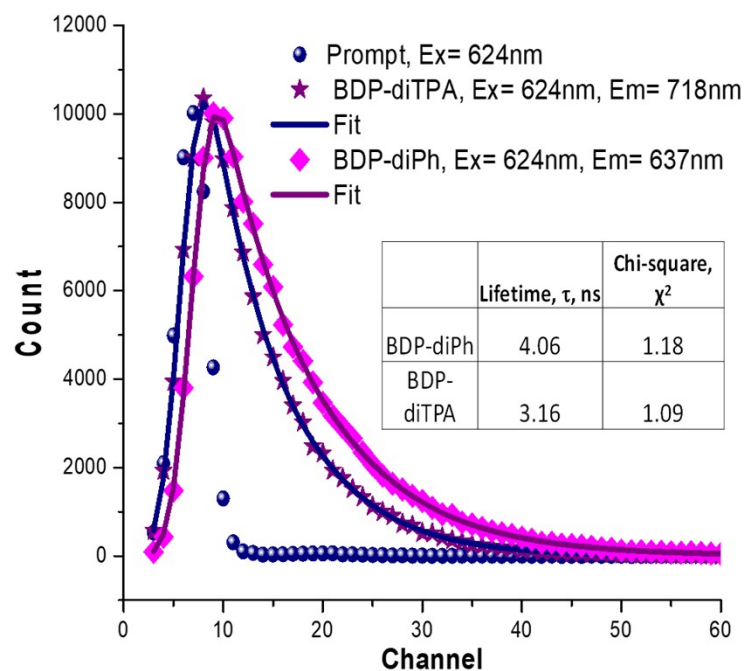

**Figure S12.** Fluorescence decay curves of representative BDP derivatives in toluene.

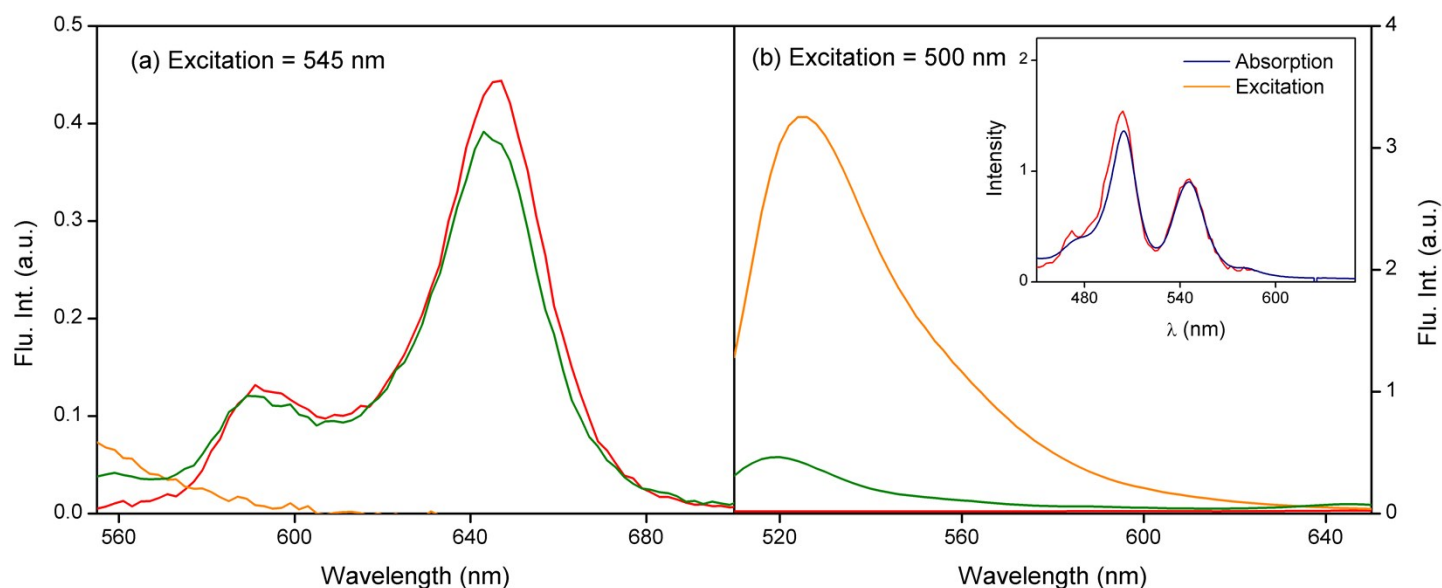

**Figure S13.** Steady-state fluorescence spectra of dyad BDP-AlPorF<sub>3</sub> in toluene: (a) & (b) BDP-AlPorF<sub>3</sub> (green), AlPorF<sub>3</sub>-Ph (red) and BDP-COOH (orange). Inset: Absorption (blue) and corrected fluorescence excitation (red) spectra of dyad in toluene. The spectra were normalized between 525 and 575 nm. The excitation spectrum was collected at 660 nm corresponding to the emission of AlPorF<sub>3</sub>.

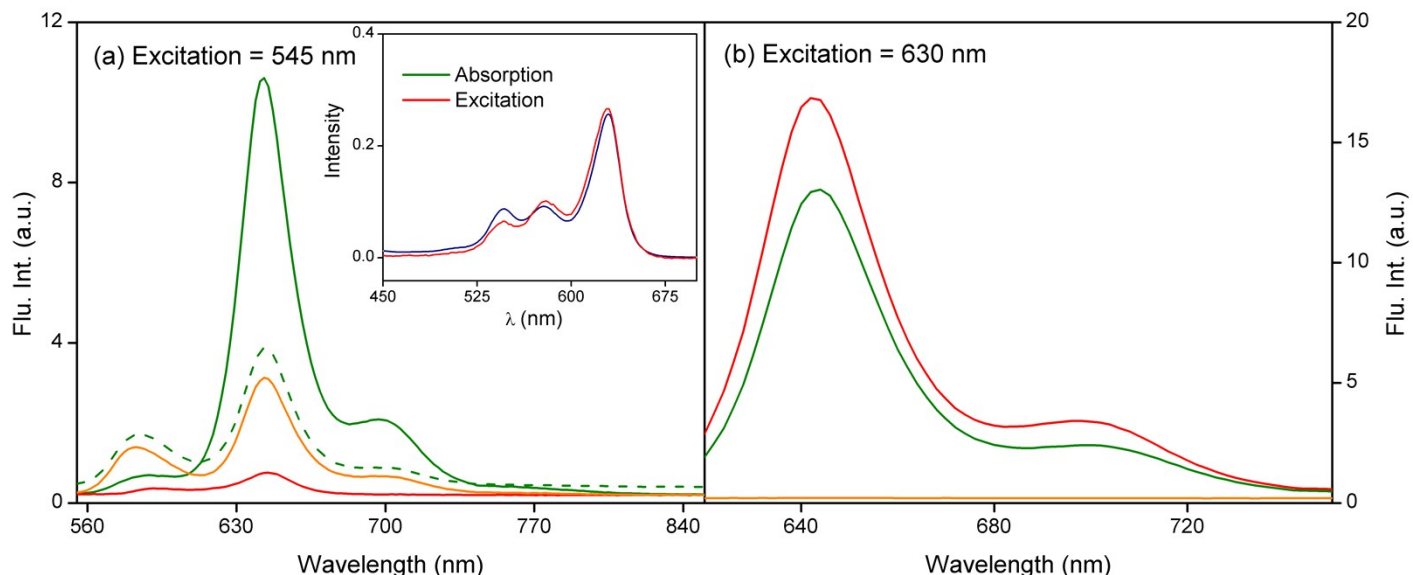

**Figure S14.** Steady-state fluorescence spectra of dyad  $\text{Ph}_2\text{-BDP-AlPorF}_3$  in toluene: (a) & (b)  $\text{Ph}_2\text{-BDP-AlPorF}_3$  (green), calculated mixture of  $\text{AlPorF}_3\text{-Ph}$  and  $\text{Ph}_2\text{-BDP-COOH}$  (dotted green),  $\text{AlPorF}_3\text{-Ph}$  (red) and  $\text{Ph}_2\text{-BDP-COOH}$  (orange). Absorption (blue) and corrected fluorescence excitation (red) spectra of (c)  $\text{Ph}_2\text{-BDP-AlPorF}_3$  and (d)  $\text{Ph}_2\text{-BDP-AlPorF}_3/\text{Im-Me}$  in toluene. The spectra were normalized between 600 and 675 nm. The excitation spectrum was collected at 710 nm corresponding to the emission of  $\text{Ph}_2\text{-BDP}$ .

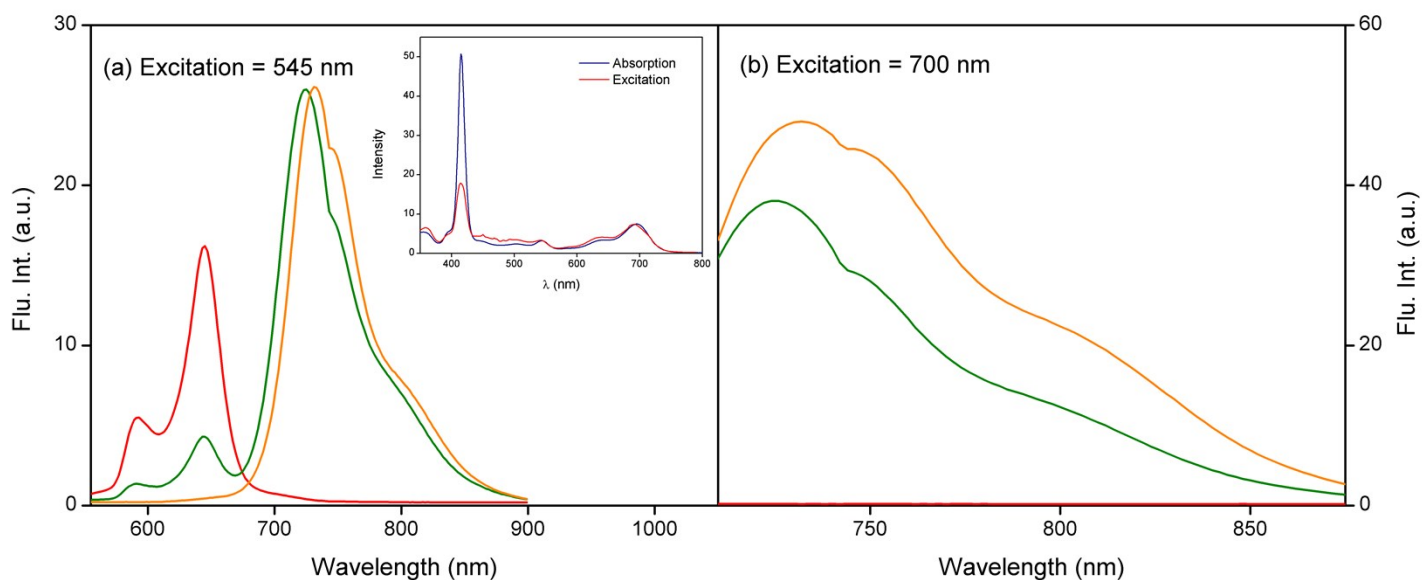

**Figure S15.** Steady-state fluorescence spectra of dyad  $\text{TPA}_2\text{-BDP-AlPorF}_3$  in toluene: (a) & (b)  $\text{TPA}_2\text{-BDP-AlPorF}_3$  (green),  $\text{AlPorF}_3\text{-Ph}$  (red) and  $\text{TPA}_2\text{-BDP-COOH}$  (orange). Inset: Absorption (blue) and corrected fluorescence excitation (red) spectra of (c)  $\text{Ph}_2\text{-BDP-AlPorF}_3$  in toluene. The spectra were normalized between 650 and 800 nm.

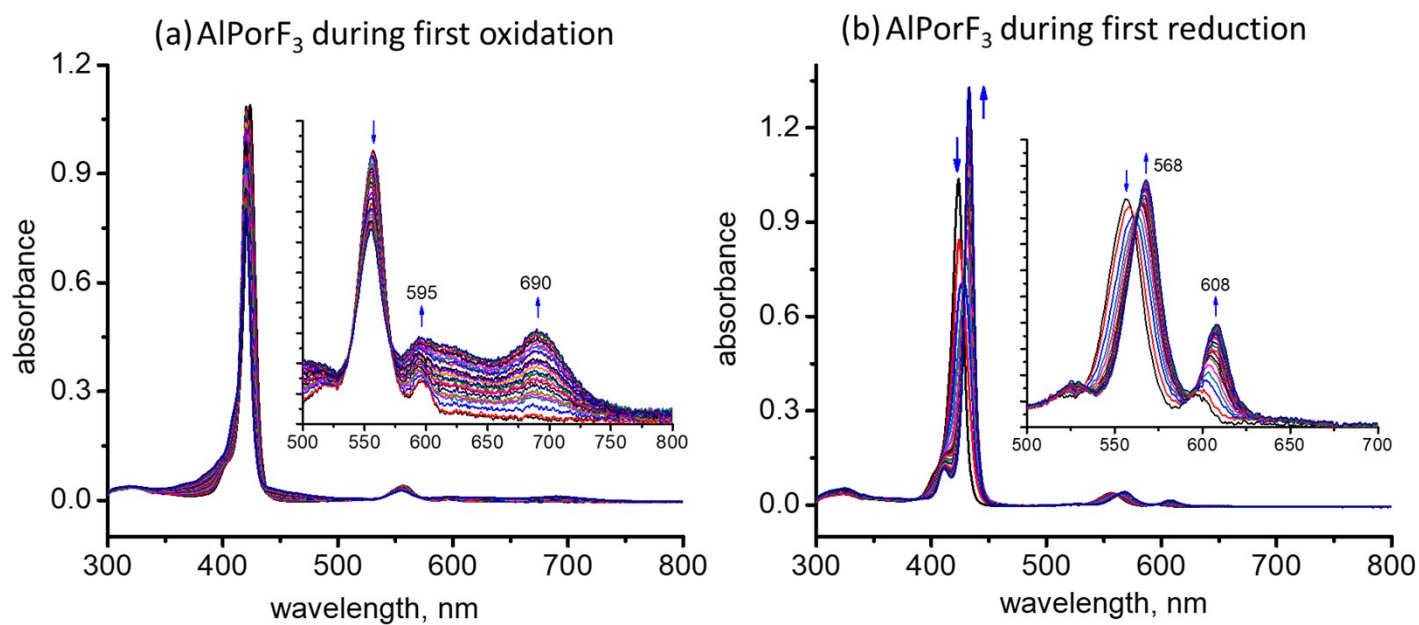

**Figure 16.** Spectral changes observed during (a) first oxidation and (b) first reduction of AlPorF<sub>3</sub> in *o*-DCB containing 0.2 M (TBA)ClO<sub>4</sub>.

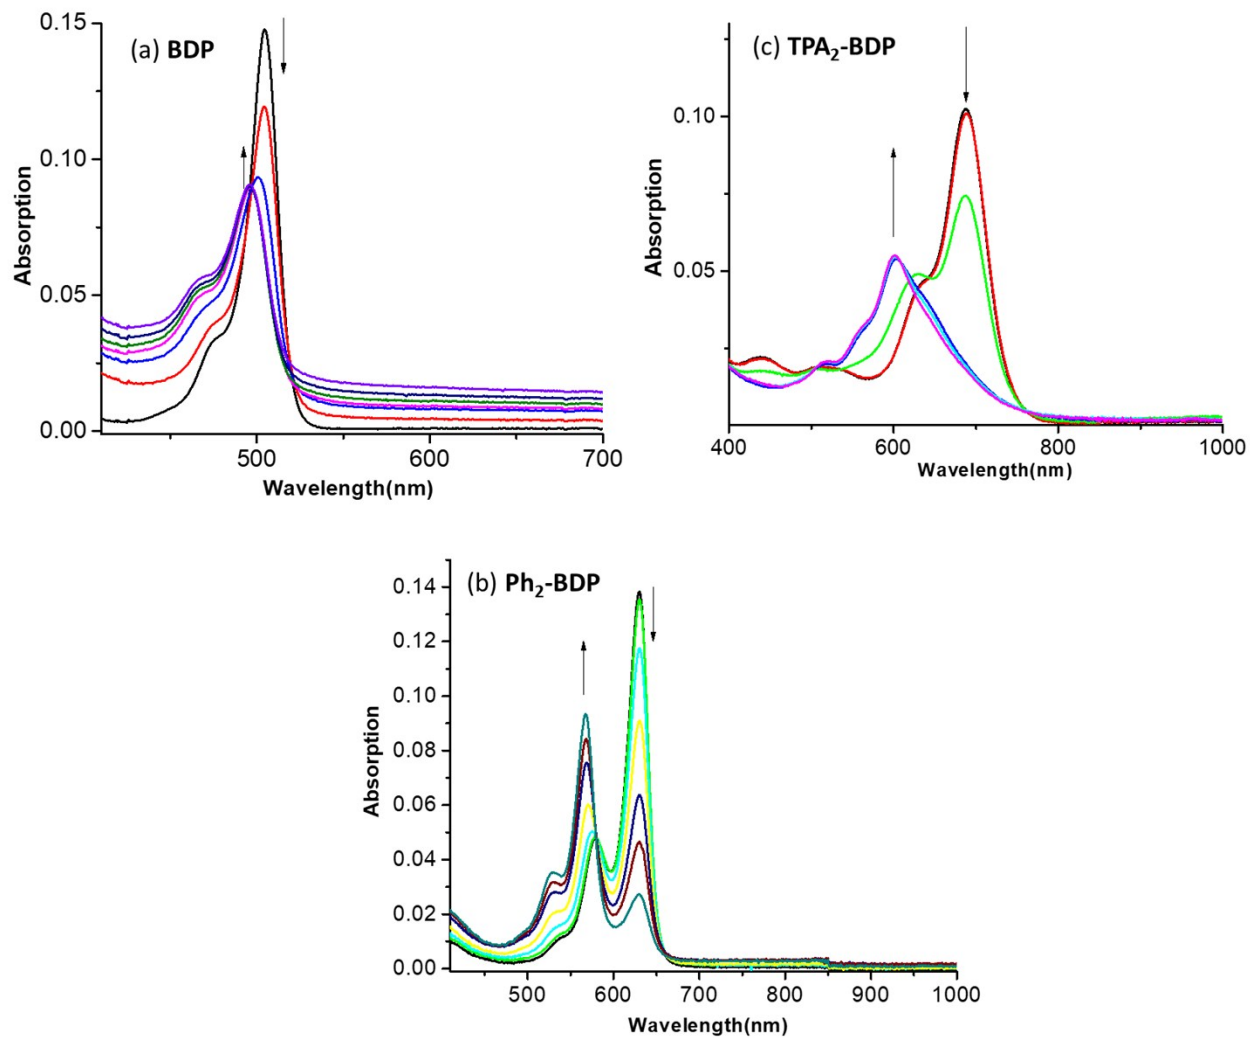

**Figure S17.** Spectral changes observed during chemical oxidation of (a) BDP, (b) Ph<sub>2</sub>-BDP and (c) TPA<sub>2</sub>-BDP in *o*-DCB. NOBF<sub>4</sub> was used as an oxidizing agent.

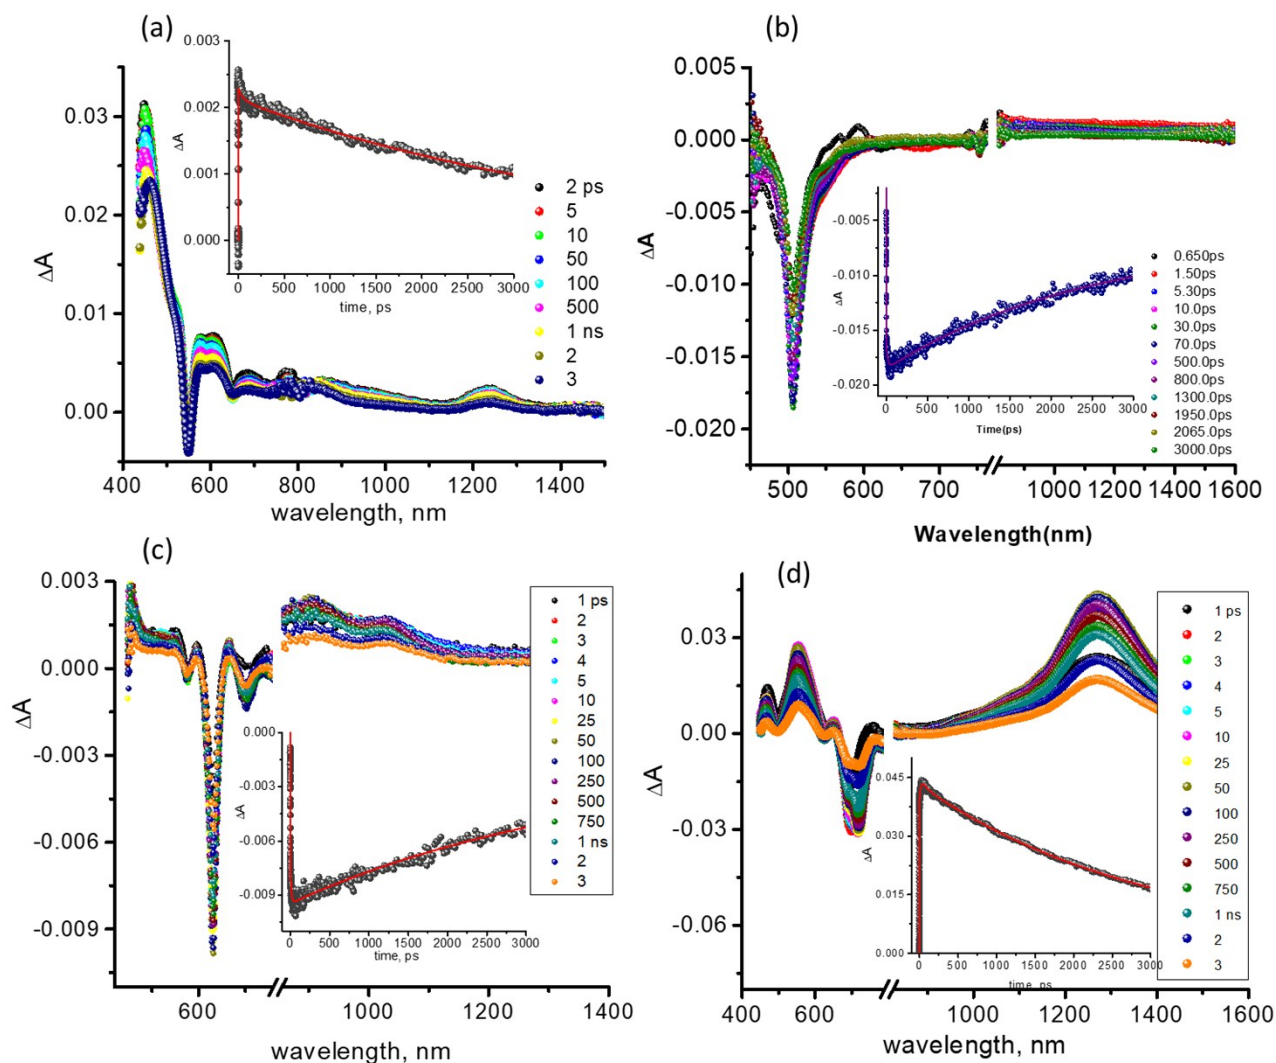

**Figure S18.** Femtosecond transient spectra of (a) AlPorF<sub>3</sub>-Ph at the excitation wavelength of 550 nm (inset time profile of 1230 nm), (b) BDP at the excitation wavelength of 500 nm (inset: time profile of 505 nm), (c) (Ph)<sub>2</sub>-BDP at the excitation wavelength of 555 nm (inset: time profile of the 630 peak), and (d) (TPA)<sub>2</sub>-BDP at the excitation wavelength of 685 nm (inset: time profile of the 1280 nm). All spectra were recorded in toluene.

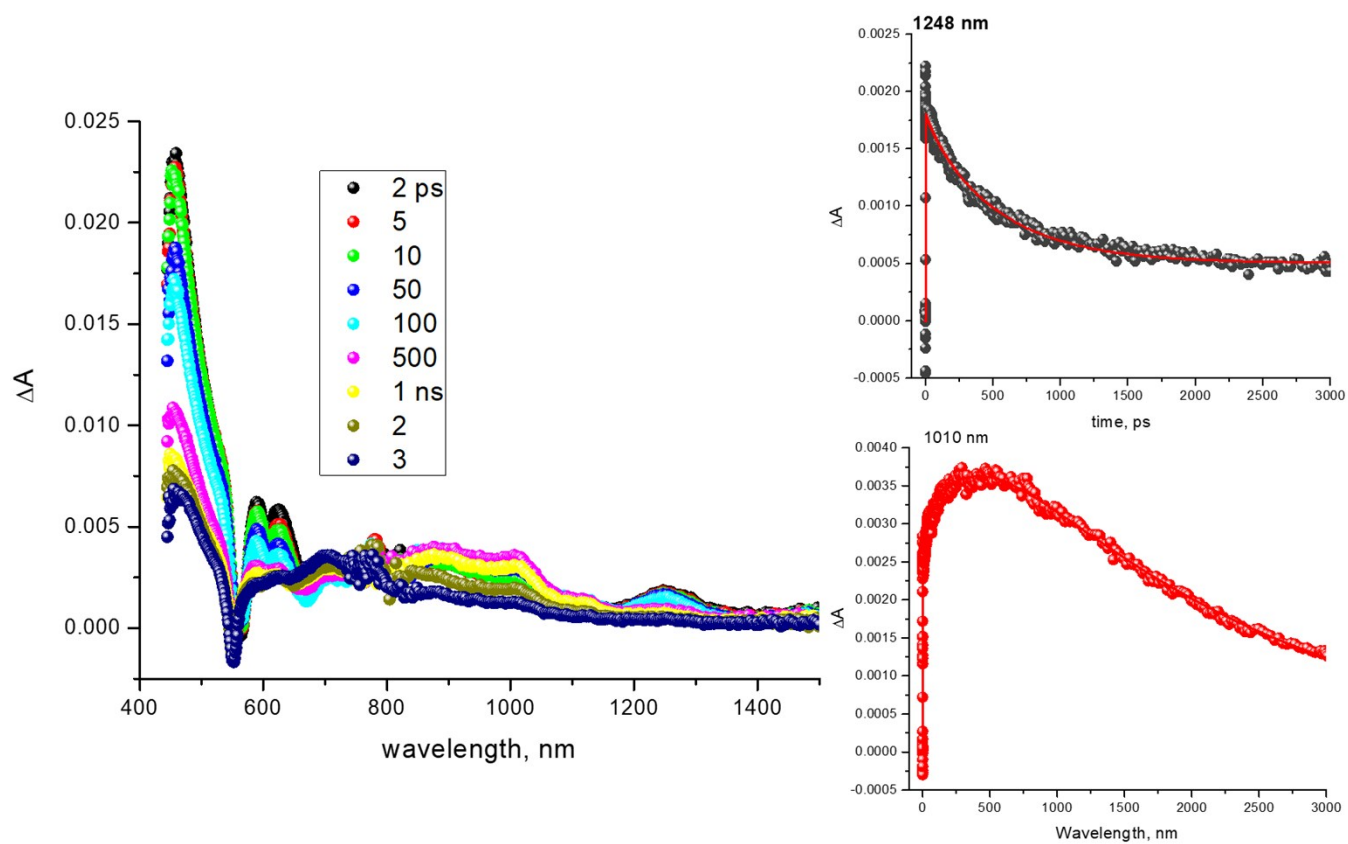

**Figure S19.** Femtosecond transient spectra at the indicated delay times of Ph-AlPorF<sub>3</sub>←Im-C<sub>60</sub> dyad in toluene at the excitation wavelength of 550 nm. The time profile of 1250 and 1010 nm peaks are shown in the right-hand panel.
